# Supplementary material for: Plasma Metabolites From Choline Pathway and Risk of Cardiovascular Disease in the PREDIMED (Prevention With Mediterranean Diet) Study
Source: PubMed Central journal article supplement — J Am Heart Assoc. 2017 Oct 28;6(11):e006524. doi: 10.1161/JAHA.117.006524 (PMC5721752; doi:10.1161/jaha.117.006524), 2017-10-28

# **SUPPLEMENTAL MATERIAL**

| <b>Table S1. Characteristics of the choline pathway metabolites</b> |                |                                                                              |                                                                            |                                            |                                                 |                                                                         |
|---------------------------------------------------------------------|----------------|------------------------------------------------------------------------------|----------------------------------------------------------------------------|--------------------------------------------|-------------------------------------------------|-------------------------------------------------------------------------|
| <b>Metabolite</b>                                                   | <b>HMDB ID</b> | <b>Metabolic pathways</b>                                                    | <b>Superclass/class/Subclass</b>                                           | <b>Origin</b>                              | <b>Disease</b>                                  | <b>Biofluid</b>                                                         |
| Trimethylamine-N-oxide (TMAO)                                       | HMDB00925      | Betaine metabolism                                                           | Organonitrogen compounds/Amines/Amine oxides and derivatives               | Drug metabolite<br>Endogenous<br>Microbial | Kidney disease<br>CVD<br>Obesity<br>T2D         | Blood<br>Feces<br>Saliva<br>Urine                                       |
| Betaine                                                             | HMDB00043      | Betaine metabolism<br>Glycine and serine metabolism<br>Methionine metabolism | Organic acids and derivatives/Carboxylic acids and derivatives/Amino acids | Endogenous<br>Diet                         | Kidney disease<br>Lung cancer<br>CVD<br>T2D     | Blood<br>Breast Milk<br>Saliva<br>Urine                                 |
| Choline                                                             | HMDB00097      | Betaine metabolism<br>Methionine metabolism<br>Phospholipid biosynthesis     | Organonitrogen compounds/quaternary ammonium salts/cholines                | Drug<br>Food<br>Plant                      | Lung cancer<br>Alzheimer<br>CVD<br>Pre-diabetes | Blood<br>Breast Milk<br>Cerebrospinal Fluid<br>Feces<br>Saliva<br>Urine |
| Phosphocholine                                                      | HMDB00284      | Phospholipid biosynthesis<br>Sphingolipid metabolism                         | Organonitrogen compound/quaternary ammonium salts/cholines                 | Endogenous                                 | Alzheimer<br>CVD                                | Blood<br>Breast Milk<br>Cerebrospinal Fluid<br>Saliva<br>Urine          |
| Alphaglycerophosphocholine                                          | HMDB00086      | Glycerophospholipid metabolism                                               | Lipids/Glycerophospholipids/glycerophosphocholine                          | Endogenous<br>Food                         | Alzheimer<br>CVD                                | Blood<br>Breast Milk<br>Cerebrospinal Fluid<br>Saliva                   |

Abbreviations: CVD, cardiovascular disease; TMAO, Trimethylamine-N-oxide; T2D, type 2 diabetes mellitus.

|                                   | <b>Total population</b> | <b>Cases (229)</b> | <b>Non-cases (751)</b> | <b>P value</b> |
|-----------------------------------|-------------------------|--------------------|------------------------|----------------|
| <b>Trimethylamine-N-oxide</b>     | 5.88 (6.48)             | 5.84 (6.28)        | 5.89 (6.55)            | 0.92           |
| <b>Betaine</b>                    | 61.00 (17.60)           | 61.17 (16.66)      | 60.95 (17.90)          | 0.86           |
| <b>Choline</b>                    | 23.75 (5.09)            | 25.04 (5.10)       | 23.36 (5.03)           | <0.001         |
| <b>Phosphocholine</b>             | 0.68 (0.66)             | 0.75 (0.81)        | 0.65 (0.61)            | 0.09           |
| <b>Alphaglycerophosphocholine</b> | 3.47 (2.64)             | 3.98 (3.15)        | 3.31 (2.44)            | 0.57           |

*Cases: composite of cardiovascular disease events: myocardial infarction, stroke and cardiovascular death.*

|                                   | <b>Control (303)</b> | <b>Mediterranean Diet +<br/>extra-virgin olive oil (363)</b> | <b>Mediterranean Diet +<br/>Nuts (314)</b> |
|-----------------------------------|----------------------|--------------------------------------------------------------|--------------------------------------------|
| <b>BASELINE</b>                   |                      |                                                              |                                            |
| <b>Trimethylamine-N-oxide</b>     | 6.21 (7.22)          | 5.61 (5.99)                                                  | 5.86 (6.28)                                |
| <b>Betaine</b>                    | 60.70 (16.12)        | 60.44 (18.11)                                                | 61.95 (18.40)                              |
| <b>Choline</b>                    | 23.14 (4.72)         | 23.99 (5.01)                                                 | 24.07 (5.49)                               |
| <b>Phosphocholine</b>             | 0.59 (0.54)          | 0.72 (0.68)                                                  | 0.71 (0.74)                                |
| <b>Alphaglycerophosphocholine</b> | 3.31 (2.21)          | 3.44 (2.19)                                                  | 3.65 (3.38)                                |
| <b>1-YEAR</b>                     |                      |                                                              |                                            |
| <b>Trimethylamine-N-oxide</b>     | 6.55 (7.75)          | 7.14 (9.73)                                                  | 5.80 (7.10)                                |
| <b>Betaine</b>                    | 60.62 (15.92)        | 60.70 (18.21)                                                | 62.35 (18.35)                              |
| <b>Choline</b>                    | 24.08 (5.11)         | 24.42 (5.96)                                                 | 24.46 (5.14)                               |
| <b>Phosphocholine</b>             | 0.61 (0.55)          | 0.62 (0.53)                                                  | 0.65 (0.50)                                |
| <b>Alphaglycerophosphocholine</b> | 3.86 (3.91)          | 3.50 (2.73)                                                  | 4.26 (5.67)                                |

**Table S4. Joint associations of the scores and intervention group with risk of cardiovascular disease and stroke**

|                                 | MedDiet interventions | Control           | P interaction |
|---------------------------------|-----------------------|-------------------|---------------|
| <b>CARDIOVASCULAR DISEASE</b>   |                       |                   |               |
| <b>Choline metabolite score</b> |                       |                   |               |
| Q1                              | Ref.                  | 1.74 (0.77, 3.89) | 0.09          |
| Q2-Q4                           | 1.70 (0.99, 2.91)     | 2.53 (1.41, 4.53) |               |
| <b>Betaine to choline ratio</b> |                       |                   |               |
| Q1                              | 0.67 (0.45, 0.99)     | Ref.              | 0.91          |
| Q2-Q4                           | 0.43 (0.25, 0.77)     | 0.74 (0.38, 1.44) |               |
| <b>STROKE</b>                   |                       |                   |               |
| <b>Choline metabolite score</b> |                       |                   |               |
| Q1                              | Ref.                  | 2.48 (0.94, 6.53) | 0.06          |
| Q2-Q4                           | 1.76 (0.85, 3.63)     | 2.66 (1.22, 5.80) |               |
| <b>Betaine to choline ratio</b> |                       |                   |               |
| Q1                              | 0.60 (0.37, 0.96)     | Ref.              | 0.76          |
| Q2-Q4                           | 0.48 (0.23, 0.99)     | 0.77 (0.32, 1.84) |               |

An inverse normal transformation was applied to raw baseline values. To build the score, we applied a weighted sum of concentrations of five metabolites in the choline pathway (trimethylamine-N-oxide (TMAO), betaine, choline, phosphocholine and alphaglycerophosphocholine). The ratio between betaine and choline was calculated by dividing the raw values and then applying inverse normal transformations. Models were adjusted for age, sex, body mass index, family history of premature heart disease, smoking, physical activity (metabolic equivalent task units in min/d), hypertension, dyslipidemia, and diabetes. Abbreviations: TMAO, trimethylamine N oxide. P for interaction were derived from Cox models adjusted as above, including an interaction term between the intervention group (MedDiet vs. control) and the score as a continuous variable. MedDiet, Mediterranean diet.

**Table S5. Risk of cardiovascular disease and stroke by 1-year changes in choline pathway metabolites in the PREDIMED Study**

|                                   | Quartiles of metabolite concentration |                   |                   |                   | <i>P</i> <sub>trend</sub> | HR per 1<br>SD increment | <i>P</i> value |
|-----------------------------------|---------------------------------------|-------------------|-------------------|-------------------|---------------------------|--------------------------|----------------|
|                                   | Q1                                    | Q2                | Q3                | Q4                |                           |                          |                |
| <b>CARDIOVASCULAR DISEASE</b>     |                                       |                   |                   |                   |                           |                          |                |
| <b>TMAO</b>                       |                                       |                   |                   |                   |                           |                          |                |
| Cases                             | 39                                    | 35                | 47                | 55                |                           |                          |                |
| Multivariable Model 1             | Ref.                                  | 0.98 (0.44, 2.14) | 1.34 (0.64, 2.81) | 1.39 (0.71, 2.74) | 0.13                      | 1.06 (0.88, 1.27)        | 0.54           |
| Multivariable Model 2             | Ref.                                  | 1.08 (0.47, 2.50) | 1.44 (0.65, 3.18) | 1.42 (0.69, 2.92) | 0.18                      | 1.04 (0.85, 1.25)        | 0.72           |
| <b>Betaine</b>                    |                                       |                   |                   |                   |                           |                          |                |
| Cases                             | 56                                    | 38                | 44                | 38                |                           |                          |                |
| Multivariable Model 1             | Ref.                                  | 0.61 (0.36, 1.02) | 0.59 (0.35, 0.99) | 0.60 (0.35, 1.02) | 0.08                      | 0.80 (0.66, 0.98)        | 0.03           |
| Multivariable Model 2             | Ref.                                  | 0.58 (0.34, 0.98) | 0.63 (0.37, 1.06) | 0.61 (0.35, 1.04) | 0.11                      | 0.83 (0.68, 1.01)        | 0.07           |
| <b>Choline</b>                    |                                       |                   |                   |                   |                           |                          |                |
| Cases                             | 59                                    | 40                | 42                | 35                |                           |                          |                |
| Multivariable Model 1             | Ref.                                  | 0.72 (0.43, 1.21) | 0.81 (0.47, 1.39) | 0.65 (0.36, 1.16) | 0.20                      | 0.89 (0.73, 1.09)        | 0.27           |
| Multivariable Model 2             | Ref.                                  | 0.71 (0.41, 1.20) | 0.81 (0.46, 1.42) | 0.68 (0.38, 1.23) | 0.28                      | 0.92 (0.75, 1.14)        | 0.46           |
| <b>Phosphocholine</b>             |                                       |                   |                   |                   |                           |                          |                |
| Cases                             | 42                                    | 49                | 36                | 49                |                           |                          |                |
| Multivariable Model 1             | Ref.                                  | 0.97 (0.58, 1.62) | 0.94 (0.55, 1.63) | 1.20 (0.71, 2.00) | 0.47                      | 1.15 (0.94, 1.41)        | 0.15           |
| Multivariable Model 2             | Ref.                                  | 0.95 (0.57, 1.60) | 1.02 (0.58, 1.79) | 1.21 (0.70, 2.06) | 0.44                      | 1.15 (0.93, 1.42)        | 0.18           |
| <b>Alphaglycerophosphocholine</b> |                                       |                   |                   |                   |                           |                          |                |
| Cases                             | 47                                    | 52                | 29                | 47                |                           |                          |                |
| Multivariable Model 1             | Ref.                                  | 1.12 (0.63, 1.99) | 0.77 (0.41, 1.44) | 1.02 (0.58, 1.81) | 0.79                      | 1.10 (0.91, 1.33)        | 0.30           |
| Multivariable Model 2             | Ref.                                  | 1.07 (0.59, 1.92) | 0.78 (0.41, 1.49) | 1.05 (0.59, 1.88) | 0.92                      | 1.14 (0.94, 1.38)        | 0.17           |
| <b>STROKE</b>                     |                                       |                   |                   |                   |                           |                          |                |
| <b>TMAO</b>                       |                                       |                   |                   |                   |                           |                          |                |
| Cases                             | 21                                    | 20                | 24                | 30                |                           |                          |                |
| Multivariable Model 1             | Ref.                                  | 1.04 (0.35, 3.03) | 1.24 (0.44, 3.54) | 1.29 (0.51, 3.26) | 0.42                      | 1.02 (0.80, 1.28)        | 0.90           |
| Multivariable Model 2             | Ref.                                  | 1.16 (0.36, 3.65) | 1.35 (0.45, 4.09) | 1.34 (0.50, 3.59) | 0.47                      | 0.99 (0.78, 1.26)        | 0.82           |
| <b>Betaine</b>                    |                                       |                   |                   |                   |                           |                          |                |
| Cases                             | 31                                    | 17                | 25                | 22                |                           |                          |                |
| Multivariable Model 1             | Ref.                                  | 0.47 (0.23, 0.96) | 0.60 (0.31, 1.14) | 0.63 (0.32, 1.23) | 0.29                      | 0.84 (0.64, 1.09)        | 0.20           |

|                                   |      |                   |                   |                   |      |                   |      |
|-----------------------------------|------|-------------------|-------------------|-------------------|------|-------------------|------|
| Multivariable Model 2             | Ref. | 0.47 (0.23, 0.98) | 0.64 (0.33, 1.23) | 0.67 (0.34, 1.32) | 0.40 | 0.86 (0.66, 1.13) | 0.30 |
| <b>Choline</b>                    |      |                   |                   |                   |      |                   |      |
| Cases                             | 34   | 22                | 21                | 18                |      |                   |      |
| Multivariable Model 1             | Ref. | 0.62 (0.32, 1.20) | 0.61 (0.31, 1.21) | 0.53 (0.25, 1.09) | 0.10 | 0.89 (0.69, 1.16) | 0.40 |
| Multivariable Model 2             | Ref. | 0.62 (0.32, 1.21) | 0.64 (0.32, 1.29) | 0.58 (0.28, 1.21) | 0.18 | 0.93 (0.71, 1.22) | 0.61 |
| <b>Phosphocholine</b>             |      |                   |                   |                   |      |                   |      |
| Cases                             | 28   | 24                | 21                | 22                |      |                   |      |
| Multivariable Model 1             | Ref. | 0.92 (0.49, 1.74) | 1.08 (0.54, 2.15) | 0.99 (0.50, 1.95) | 0.93 | 1.00 (0.77, 1.30) | 0.86 |
| Multivariable Model 2             | Ref. | 0.90 (0.47, 1.70) | 1.17 (0.58, 2.39) | 1.00 (0.49, 2.00) | 0.89 | 0.98 (0.74, 1.30) | 0.92 |
| <b>Alphaglycerophosphocholine</b> |      |                   |                   |                   |      |                   |      |
| Cases                             | 25   | 28                | 19                | 23                |      |                   |      |
| Multivariable Model 1             | Ref. | 1.03 (0.56, 1.87) | 0.84 (0.42, 1.68) | 0.88 (0.46, 1.68) | 0.57 | 1.04 (0.81, 1.34) | 0.74 |
| Multivariable Model 2             | Ref. | 1.00 (0.53, 1.88) | 0.88 (0.48, 1.77) | 0.90 (0.45, 1.77) | 0.69 | 1.08 (0.83, 1.39) | 0.56 |

Inverse normal transformation was applied to raw values of changes in metabolite concentration. Model 1 was adjusted for age, sex, BMI, family history of premature heart disease, and smoking and was stratified by intervention group. Model 2 was further adjusted for physical activity, hypertension, dyslipidemia, and diabetes. All models were adjusted for baseline metabolites levels and the interaction between baseline levels and 1-year changes.

**Figure S1.** Flow chart of study participants

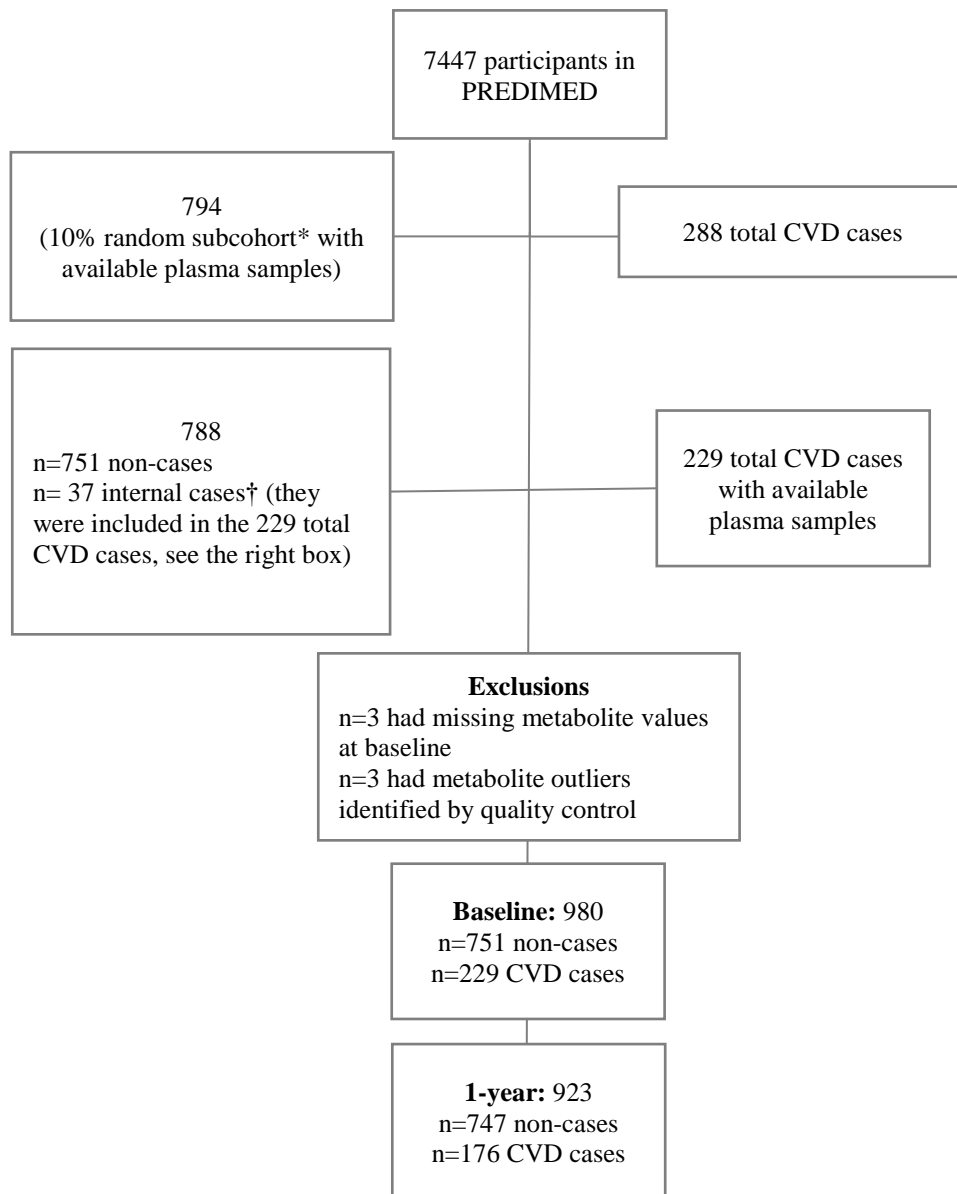

\*subcohort: a random, non-stratified sample of approximately 10% of PREDIMED participants at baseline.  
†internal cases: incident cases which were subcohort members (37 overlapping cases). They were treated as cases in the analysis (included in the 229)

**Figure S2.** Diagram of choline pathway

**Choline metabolism**

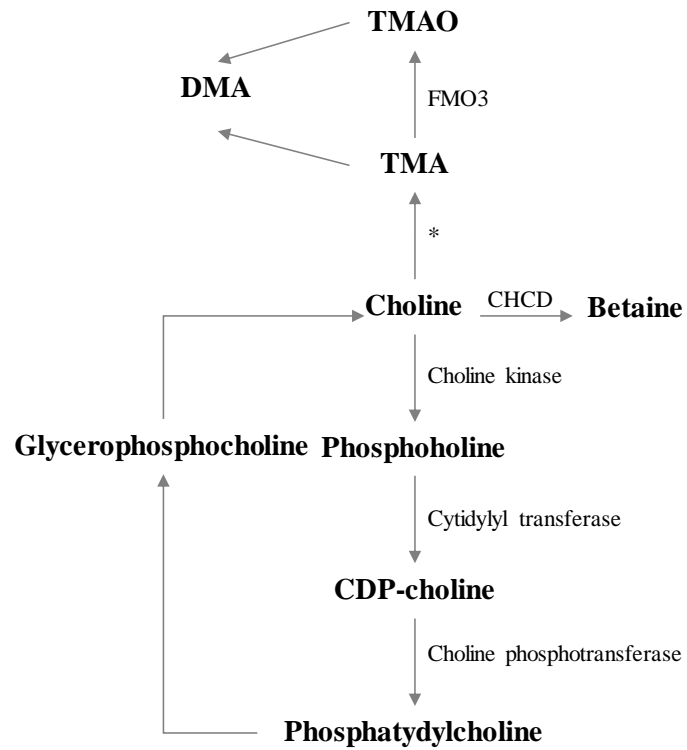

The figure shows key metabolic choline pathway. \*Bacterial degradation of choline by the gut microbiota. FMO3 indicates, Flavin-containing monooxygenase; CHCD, choline dehydrogenase;



**Figure S3. Correlation matrix for plasma metabolite levels**

Spearman Correlations coefficients of metabolites in the PREDIMED Study

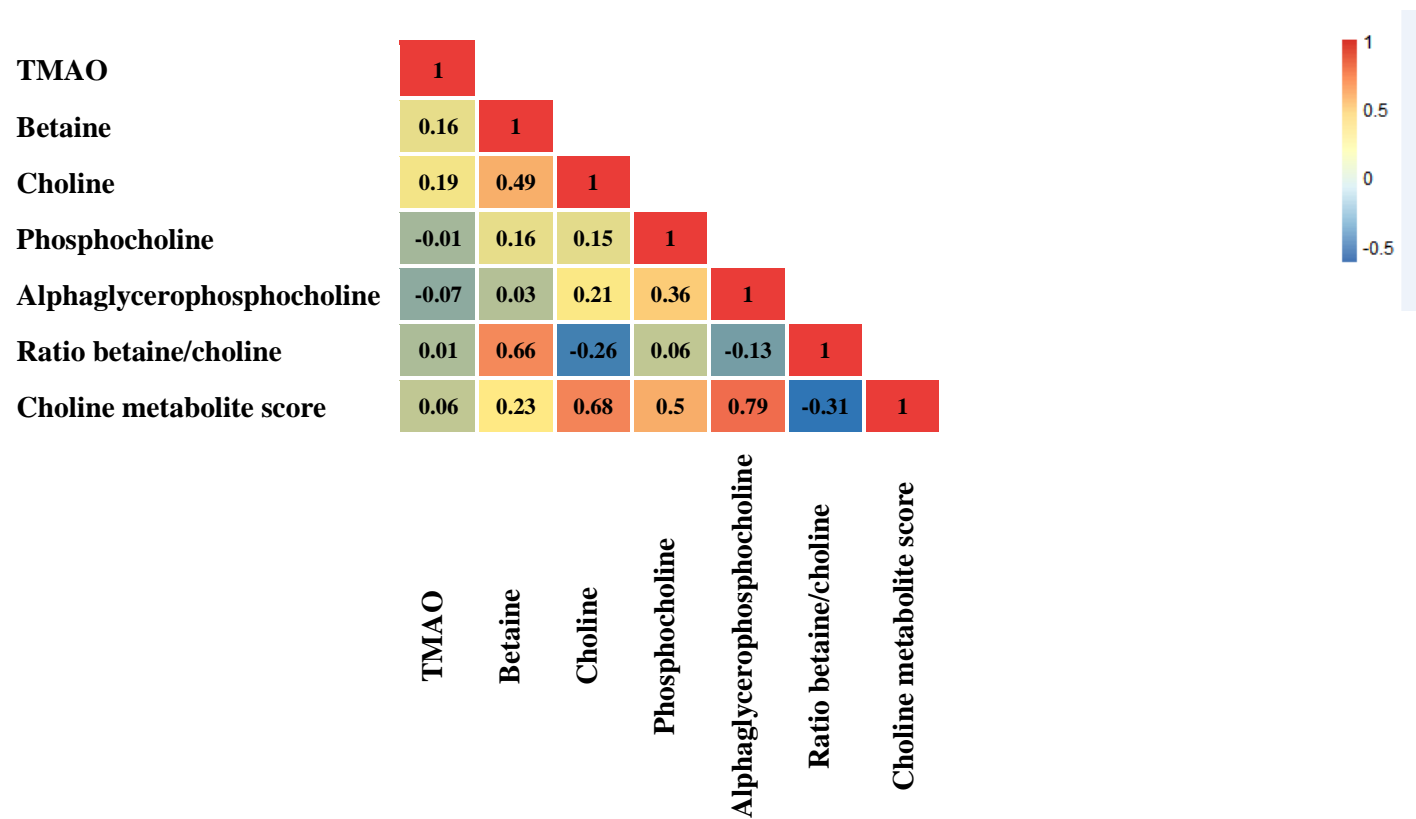

Supplement: JAH3-6-e006524-s001.pdf [file JAH3-6-e006524-s001.pdf]
